# Supplementary material
Source: PubMed Central journal article supplement (PMC8177750)
Supplement: NIHMS1707945-supplement-1.pdf [file NIHMS1707945-supplement-1.pdf]

**Supplementary Table 1: Baseline demographic information for PD subjects who remained in vs. left the study**

|                                                                               | Completer<br>(n=80) | Non-Completer<br>(n=45) | P value |
|-------------------------------------------------------------------------------|---------------------|-------------------------|---------|
| Gender, n (M/F)                                                               | 45/35               | 24/21                   | 0.75    |
| Age (y)                                                                       | 66.0 ± 8.4          | 70.6 ± 10.1             | 0.007   |
| Education (y)                                                                 | 14.8 ± 2.9          | 14.4 ± 2.6              | 0.40    |
| <b>Clinical measures</b>                                                      |                     |                         |         |
| Disease duration (y), median (25 <sup>th</sup> , 75 <sup>th</sup> percentile) | 3.8 (1.3, 8.6)      | 4.6 (0.6, 12.5)         | 0.99    |
| LEDD (mg)                                                                     | 679 ± 407           | 577 ± 571               | 0.26    |
| UPDRS-I                                                                       | 8.6 ± 5.8           | 13.3 ± 8.7              | 0.002   |
| UPDRS-II                                                                      | 8.9 ± 7.9           | 15.0 ± 11.7             | 0.004   |
| UPDRS-III                                                                     | 24.1 ± 14.4         | 39.6 ± 23.4             | <0.001  |
| UPDRS-IV                                                                      | 1.9 ± 2.8           | 2.9 ± 4.1               | 0.16    |
| UPDRS-Total                                                                   | 43.4 ± 24.7         | 70.9 ± 40.8             | <0.001  |
| MoCA                                                                          | 24.6 ± 3.2          | 21.4 ± 5.4              | <0.001  |
| UPSIT                                                                         | 18.6 ± 7.3          | 20.1 ± 8.3              | 0.11    |
| HDRS                                                                          | 5.6 ± 4.5           | 8.0 ± 6.0               | 0.02    |
| PDQ-39                                                                        | 15.2 ± 13.0         | 21.9 ± 13.6             | 0.02    |

Values are mean ± SD unless otherwise indicated. Abbreviations: F = female; HRDS = Hamilton Depression Rating Scale; LEDD = levodopa equivalent daily dosage; M = male; MoCA = Montreal Cognitive Assessment; PDQ-39 = Parkinson's Disease Questionnaire; UPDRS = Unified Parkinson's Disease Rating Scale, I = non-motor experiences of daily living, II = motor experiences of daily living, III = motor examination; UPSIT = University of Pennsylvania Smell Identification Test

**Supplementary Table 2: Estimated annual changes of common data elements for PD and PD subgroups with complete data**

|                    | PD                   |                   | PDE                  |               | PDM                  |              | PDL                 |              |
|--------------------|----------------------|-------------------|----------------------|---------------|----------------------|--------------|---------------------|--------------|
|                    | Estimate (95% CI)    | P value           | Estimate (95% CI)    | P value       | Estimate (95% CI)    | P value      | Estimate (95% CI)   | P value      |
| <b>MDS-UPDRS I</b> | 0.43 (0.02, 0.85)    | <b>0.041</b>      | 0.75 (-0.12, 1.62)   | 0.092         | 0.24 (-0.47, 0.96)   | 0.501        | 0.42 (-0.23, 1.06)  | 0.203        |
| <b>II</b>          | 0.96 (0.49, 1.44)    | <b>0.0001</b>     | 1.01 (0.01, 2.00)    | <b>0.048</b>  | 0.48 (-0.34, 1.30)   | 0.247        | 1.32 (0.60, 2.05)   | <b>0.001</b> |
| <b>III</b>         | 0.02 (-1.00, 1.03)   | 0.977             | 0.62 (-1.50, 2.75)   | 0.561         | -0.55 (-2.31, 1.20)  | 0.532        | 0.14 (-1.44, 1.71)  | 0.861        |
| <b>Total</b>       | 1.57 (0.07, 3.07)    | <b>0.040</b>      | 2.30 (-0.83, 5.43)   | 0.148         | 0.51 (-2.07, 3.10)   | 0.694        | 2.03 (-0.29, 4.35)  | 0.085        |
| <b>MoCA</b>        | -0.25 (-0.47, -0.03) | <b>0.027</b>      | 0.05 (-0.40, 0.50)   | 0.817         | -0.45 (-0.82, -0.08) | <b>0.018</b> | -0.26 (-0.61, 0.09) | 0.144        |
| <b>UPSIT</b>       | -0.81 (-1.15, -0.47) | <b>&lt;0.0001</b> | -1.43 (-2.13, -0.72) | <b>0.0002</b> | -0.91 (-1.47, -0.35) | <b>0.002</b> | -0.41 (-0.92, 0.10) | 0.115        |
| <b>HDRS</b>        | 0.12 (-0.23, 0.47)   | 0.489             | 0.34 (-0.37, 1.06)   | 0.345         | 0.30 (-0.29, 0.89)   | 0.314        | -0.17 (-0.73, 0.39) | 0.550        |
| <b>PDQ-39</b>      | 0.98 (0.37, 1.59)    | <b>0.002</b>      | 0.91 (-0.35, 2.18)   | 0.154         | 0.78 (-0.26, 1.82)   | 0.140        | 1.20 (0.23, 2.17)   | <b>0.016</b> |

Data represent the estimates for the annual rate of change for PD and PD subgroups using linear mixed effects repeated measures ANOVA models. 95% confidence intervals are in parentheses and the P value for each estimate is given. Significant changes are indicated by bold text.

Abbreviations: CI = confidence interval; HDRS = Hamilton Depression Rating Scale; LEDD = levodopa equivalent daily dosage; MoCA = Montreal Cognitive Assessment; PD = Parkinson's disease; PDQ-39 = Parkinson's Disease Questionnaire; UPDRS = Unified Parkinson's Disease Rating Scale, I = non-motor experiences of daily living, II = motor experiences of daily living, III = motor examination; UPSIT = University of Pennsylvania Smell Identification Test.

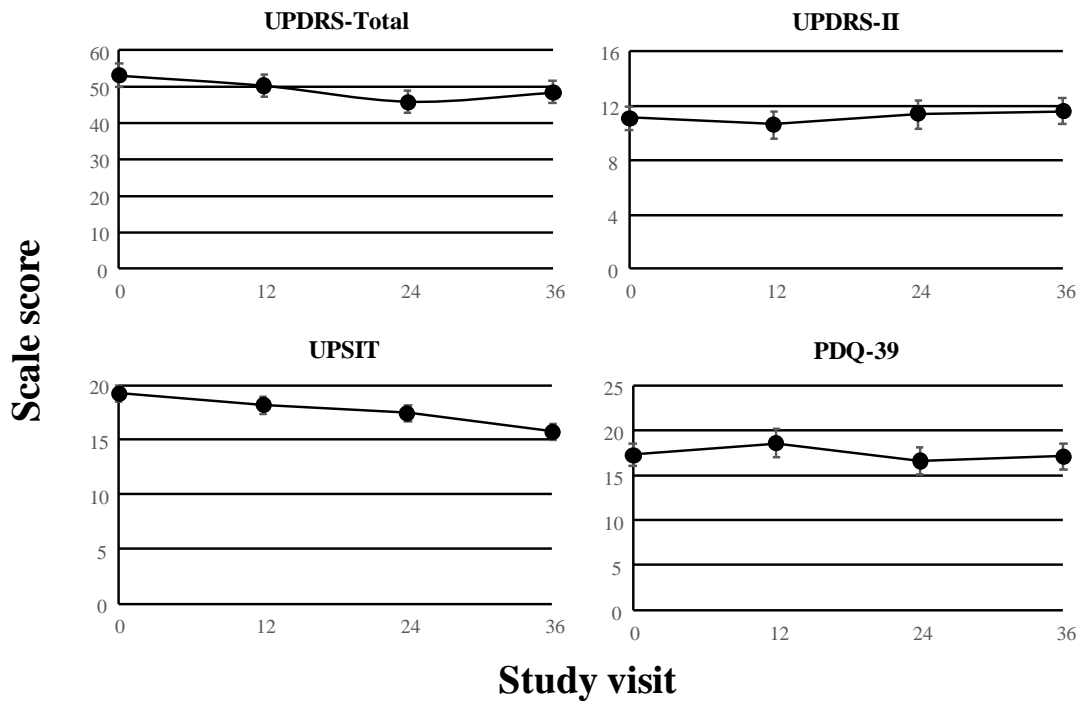

Supplementary Figure 1: Depiction of the metrics that changed significantly in PD subjects over the 36 months of the study. The data represent the raw mean and standard errors for each metric.

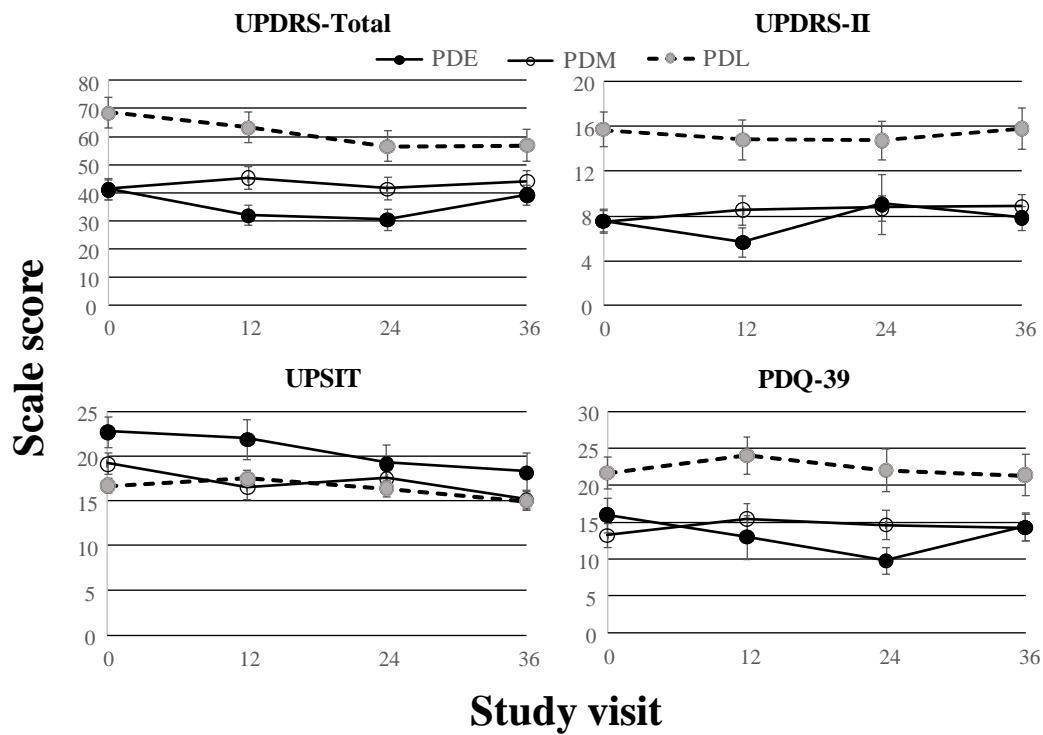

Supplementary Figure 2: Depiction of the significant metrics in the PD subgroups over the 36 months of the study. The data represent the raw mean and standard errors for each metric.
